# Supplementary material for: Genome-wide identification of genes encoding SWI/SNF components in soybean and the functional characterization of GmLFR1 in drought-stressed plants
Source: Front Plant Sci. 2023 May 15;14:1176376. doi: 10.3389/fpls.2023.1176376 (PMC10225534; doi:10.3389/fpls.2023.1176376)
Supplement: Supplementary file 2 [file Table_1.xlsx]

## Sheet: Sheet1
Supplement Table.1. List of primers used in this study.
Primer Name	Primer sequences(5'-3')	Purpose
GmARP4A-Q-FP	GCTGGTTATGCTGGTGAAGA	For RT-qPCR
GmARP4A-Q-RP	GGTCTCTACGGTACCCCAAGG
GmARP4B-Q-FP	GAAGATGCTCCCAAGGCTGTG
GmARP4B-Q-RP	CCAAGGACTGGGATCCTACATACAA
GmARP4C-Q-FP	ACAGAAAGCTACAAACTCTACTC
GmARP4C-Q-RP	TCTGCAAAACTCTCCATACCAGGG
GmARP7A-Q-FP	AACTTGACATTCGATGACATTGCTG
GmARP7A-Q-RP	ACCCTCAATCACTGGTGCAATAT
GmARP7B-Q-FP	TTCACTGGCTGACAATGTCACC
GmARP7B-Q-FP	GCCTGAGATACGTCCCACAG
GmARP7C-Q-FP	CCGGCAGTCGATGACGTTG
GmARP7C-Q-FP	ACCCTCAATCACTGGTGCAATAT
GmARP7D-Q-FP	ACTGATCCACTTTGTACCCCTAAGG
GmARP7D-Q-RP	GTGGATTGGACTTGCCAAGTTCTATT
GmBRIP1-Q-FP	AGCAACAACTTCTGCTACAACAACAG
GmBRIP1-Q-RP	GGGAGCGGGATTGGGGCTA
GmBRIP2-Q-FP	GCAGCAACAACAACAACAACAACA
GmBRIP2-Q-RP	GCGGGATTGAGGTTAGGGTTAGG
GmBRM1-Q-FP	ACTACAGGAGGAGATGACACGATAT
GmBRM1-Q-RP	TGGGTCGTCCCCTTTTTCTTTCA
GmBRM2-Q-FP	CTCCATGCACAACAAAGACCTACT
GmBRM2-Q-RP	GTGCTATTTGTTGTCCTTGCTCCA
GmBRM3-Q-FP	AGTTCAGGTGCAAGGCACAC
GmBRM3-Q-RP	ACTCATTTCTAACAGGAGTTCTGCC
GmBRM4-Q-FP	TTTGCAACCCACACCTCCTGT
GmBRM4-Q-RP	CTAACTCATTTCTGCCAATTCCATG
GmSNF5-Q-FP	ACTCCGATTTCGGGTTTCTACAGA
GmSNF5-Q-RP	GGAGGGAGCTTCAAGTCTTTAACAG
GmSWI3A1-Q-FP	GCGGATTCAGATTCGGAACTGGA
GmSWI3A1-Q-RP	CCTTCTGGAGGGCTCTTCTCTG
GmSWI3A2-Q-FP	CCGAATTCGTTGAAGCCTATGTTGT
GmSWI3A2-Q-RP	ATCCTGTGTACATCGGTAATGTCCA
GmSWI3B1-Q-FP	AACCTCTCCCTTCCACCACC
GmSWI3B1-Q-RP	CCACGAGAACCACCGAGAGT
GmSWI3B2-Q-FP	ACCGAACCTCTCCCTTCCTCC
GmSWI3B2-Q-RP	TGACGCACCTCGCATTCGTC
GmSWI3C1-Q-FP	CCGGTTCTCGAAAACGTGTCT
GmSWI3C1-Q-RP	AAGAAATGCGGCACCACTTGC
GmSWI3C2-Q-FP	CCGATCACGAAGAACGAGAAA
GmSWI3C2-Q-RP	TCCCACAGTTCCAAGACGTGC
GmSWI3C3-Q-FP	GTTGCTCAAATGGGGATTCTGCA
GmSWI3C3-Q-RP	CCCGGAATTATTCCTTGACAATGCA
GmSWI3C4-Q-FP	CTGGGAGCACGGCACATAT
GmSWI3C4-Q-RP	GGATAGGCCTGCTTTGGCA
GmSWI3D1-Q-FP	GGTTCCTCCTCCGCACCCT
GmSWI3D1-Q-RP	CCTTTTTGAGCTGCTCAGCCA
GmSWI3D2-Q-FP	ATTCACCTGGCACCGAGCT
GmSWI3D2-Q-RP	CGGCTGTCCCTTGACTTCTAAAGC
GmSWP73A-Q-FP	GTGTGTCGTCGCCGTCGAT
GmSWP73A-Q-RP	TCCATCGGTCTCAAAGGCGAG
GmSWP73B-Q-FP	GGGTGTCGTCACCGTTGATTTC
GmSWP73B-Q-RP	TCCACTGGTCTCAATGGGGAG
GmSYD1-Q-1F	GAAAACCTGCCATGCCTTTCAAG
GmSYD1-Q-1R	TGTAGTTTCTTCGGTGCTAGACCA
GmSYD2-Q-FP	TGGAGGCTGCTAAGTTTCTGCA
GmSYD2-Q-RP	ATAATCAGGCGCTCCACCAC
GmLFR1-Q-F	CTCCTTTGCCGATCAGAACAATA
GmLFR1-Q-R	CGCCAATCATCTATAACTTGAAGGA
GmLFR2-Q-F	GAATTACTTGGGCGTTTGATCA
GmLFR2-Q-R	CTGGAACTGGATGTGGCATC
GmMINU1-Q-1F	ATGGAGAATGAGCGCCAC
GmMINU1-Q-1R	ACTCACATCAGACCGAACCTT
GmMINU2-Q-1F	ATGGAGAAGGAGAATGAGCTCC
GmMINU2-Q-1R	TGCCTGTCAGGATATGCACACTT
GmMINU3-Q-1F	ATGGAGCAAGCAGTGTCACTGA
GmMINU3-Q-1R	ATACAGCGGACGACGCAA
GmBRD1-Q-FP	GCGACACAATTCAACCAACGTTGTT
GmBRD1-Q-RP	TGCGAACCATGTTGTTTACTGTC
GmBRD2-Q-FP	TCCCACAACAACAAGAACAAGACCA
GmBRD2-Q-RP	TCCCTGCGAACCATGTTTACTG
GmBRD13A-Q-FP	CGGGAAGAAGAAGAAAACGAAAC
GmBRD13A-Q-RP	AATTGCTCTAAGGTGGTATAAGATCCA
GmBRD13B-Q-FP	ACAAGTAATGCTCCTGCAGTAGAGT
GmBRD13B-Q-RP	GATGTACTTTCAGGTGATGAACCAG
GmBRD13C-Q-FP	CGAGACTGCAACGAACCACAC
GmBRD13C-Q-RP	AGCTCCTGAAACAGAAACATTAACAG
GmBRD13D-Q-FP	CGCATCGCAGCCTGATTCTC
GmBRD13D-Q-RP	ACCGGAGCTCCTGAAACAG
GmLFR1-pUBI-FP	CCTACTAGTGGATCCGGTACCATGCTGAAGAGAGAGCAAGGC	Constructs to pUBI
GmLFR1-pUBI-RP	GTCCTTATAGTCCATGGTACCCATACCCCATATGCCACGAGC
GmLFR1-p1300-FP	GAGAACACGGGGGACTCTAGAATGCTGAAGAGAGAGCAAG	Constructs to pCAMBIA1300
GmLFR1-p1300-RP	GCACCGTATACCCCATACCCTAGGTACCACTCGTTCCCG
